# Supplementary material
Source: MDPI journal article supplement (https://www.mdpi.com/2071-1050/14/11/6383)
Supplement: s1 [file s1 › sustainability-1695640-supplementary.pdf]

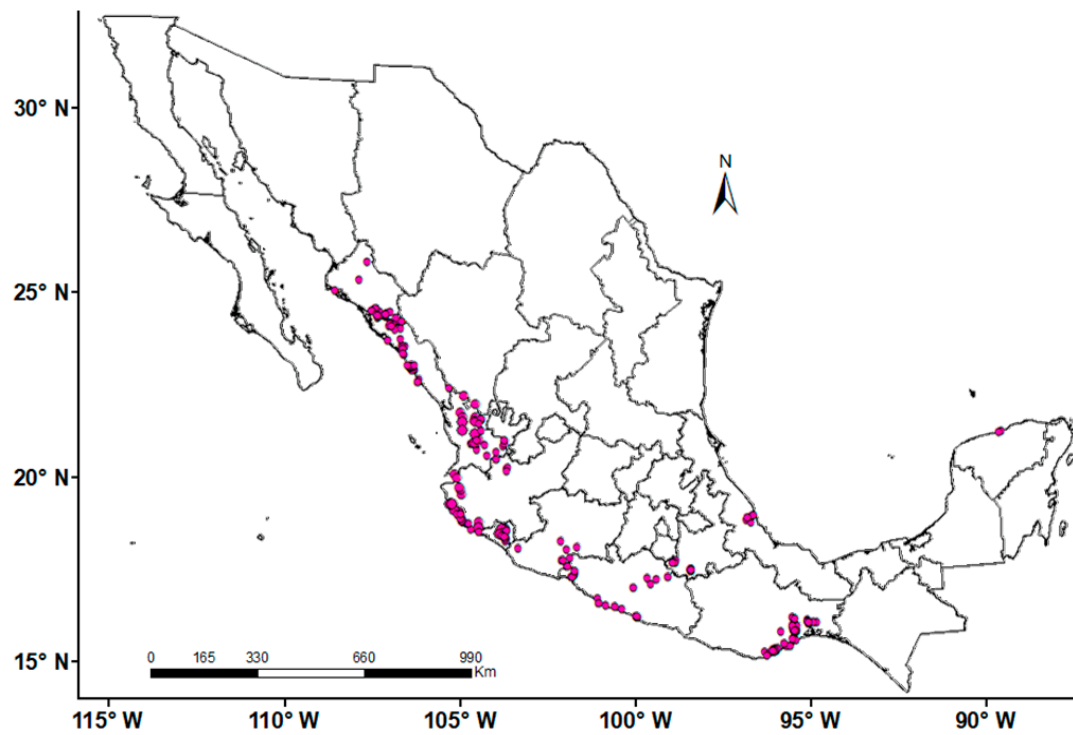

**Figure S1.** Collection sites of *Gossypium aridum* from CONABIO-SNIB and SINAREFI databases used in modeling the distribution of *G. aridum* in Mexico using flowering growing degree days and annual available soil water.
